# Supplementary figures and images for: Nilotinib Enhances Tumor Angiogenesis and Counteracts VEGFR2 Blockade in an Orthotopic Breast Cancer Xenograft Model with Desmoplastic Response
Source: PubMed Central journal article supplement — Neoplasia. 2017 Sep 20;19(11):896–907. doi: 10.1016/j.neo.2017.08.009 (PMC5608503; doi:10.1016/j.neo.2017.08.009), 2017-09-20

**A**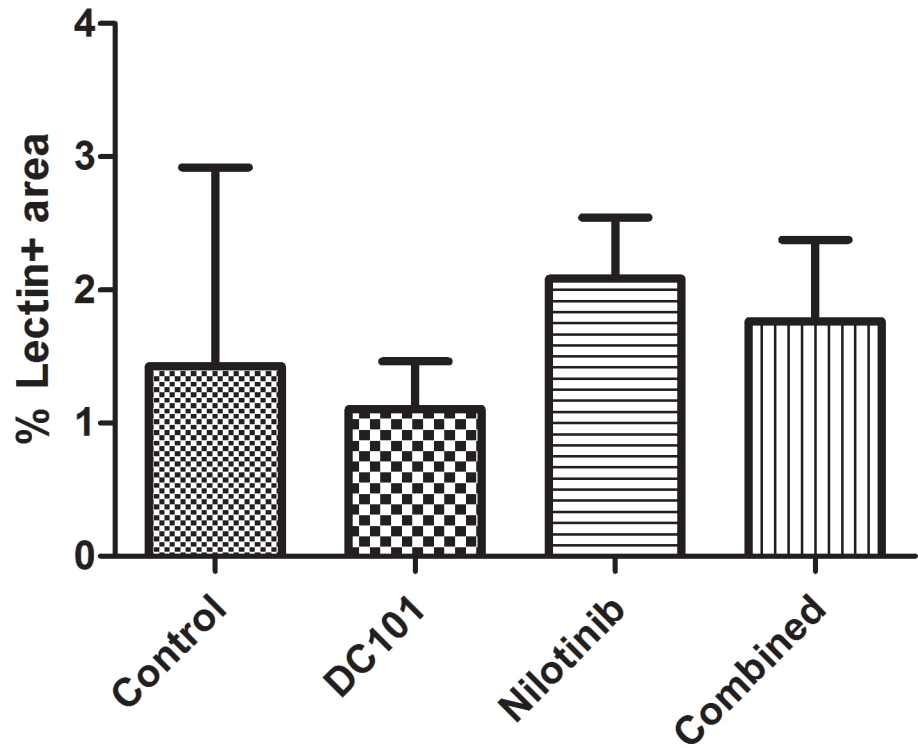**B**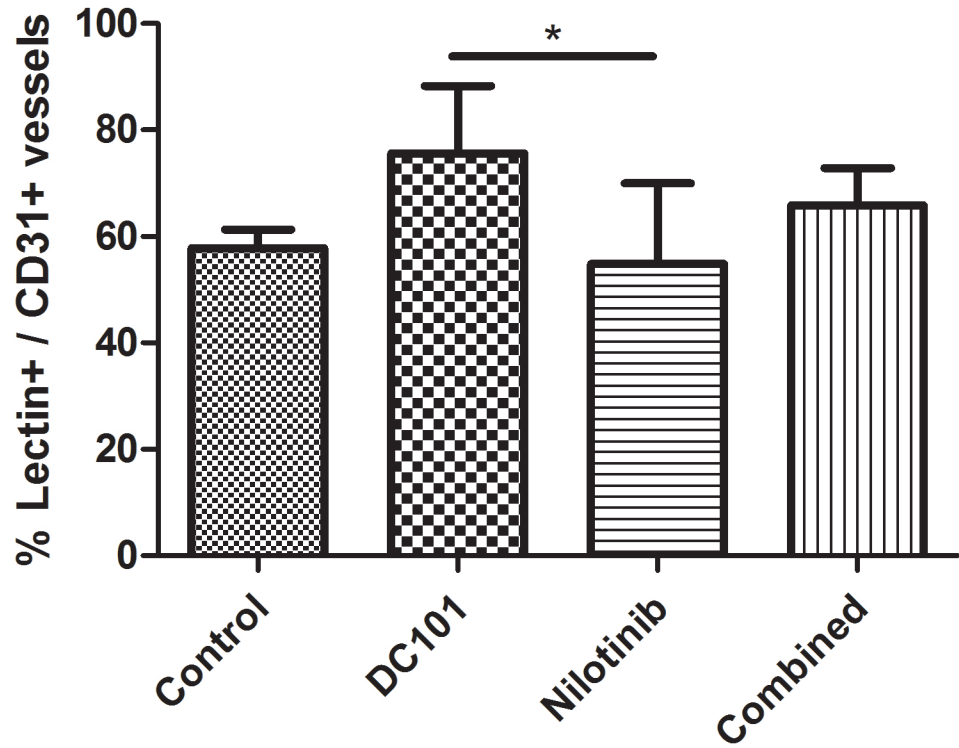

Supplement: mmc1.pdf [file mmc1.pdf]
